# Supplementary material
Source: ML conference proceedings conference paper supplement (https://proceedings.mlr.press/v37/jiao15.html)
Supplement: Supplementary file [file jiao15-supp.pdf]

---

# Supplement to “The Kendall and Mallows Kernels for Permutations”

---

**Yunlong Jiao**  
**Jean-Philippe Vert**

YUNLONG.JIAO@MINES-PARISTECH.FR  
 JEAN-PHILIPPE.VERT@MINES-PARISTECH.FR

MINES ParisTech – CBIO, PSL Research University, Institut Curie, INSERM U900, Paris, France

## Abstract

This document contains proofs and algorithms to supplement the paper titled “The Kendall and Mallows kernels for permutations” accepted to ICML 2015.

## 1. Proof to Theorem 3

*Proof.* Let  $\hat{\mathbf{w}}$  be a solution to the original SVM optimization problem, and  $\hat{\mathbf{w}}_D$  a solution to the perturbed SVM, i.e., a solution of

$$\min_{\mathbf{w}} F_D(\mathbf{w}) = \frac{\lambda}{2} \|\mathbf{w}\|^2 + \hat{R}_D(\mathbf{w}), \quad (1)$$

with  $\hat{R}_D(\mathbf{w}) = \frac{1}{m} \sum_{i=1}^m \ell(y_i \mathbf{w}^\top \Psi_D(\mathbf{x}_i))$ . Since the hinge loss is 1-Lipschitz, i.e.,  $|\ell(a) - \ell(b)| \leq |a - b|$  for any  $a, b \in \mathbb{R}$ , we obtain that for any  $\mathbf{u} \in \mathbb{R}^{\binom{m}{2}}$ :

$$\begin{aligned} \left| \hat{R}(\mathbf{u}) - \hat{R}_D(\mathbf{u}) \right| &\leq \frac{1}{m} \sum_{i=1}^m \left| \mathbf{u}^\top (\Psi(\mathbf{x}_i) - \Psi_D(\mathbf{x}_i)) \right| \\ &\leq \|\mathbf{u}\| \sup_{i=1, \dots, m} \|\Psi_D(\mathbf{x}_i) - \Psi(\mathbf{x}_i)\|. \end{aligned} \quad (2)$$

Now, since  $\hat{\mathbf{w}}_D$  is a solution of (1), it satisfies

$$\|\hat{\mathbf{w}}_D\| \leq \sqrt{\frac{2F_D(\hat{\mathbf{w}}_D)}{\lambda}} \leq \sqrt{\frac{2F_D(0)}{\lambda}} = \sqrt{\frac{2}{\lambda}},$$

and similarly  $\|\hat{\mathbf{w}}\| \leq \sqrt{2/\lambda}$  because  $\hat{\mathbf{w}}$  is a solution of the original SVM optimization problem. Using (2) and these

bounds on  $\|\hat{\mathbf{w}}_D\|$  and  $\|\hat{\mathbf{w}}\|$ , we get

$$\begin{aligned} F(\hat{\mathbf{w}}_D) - F(\hat{\mathbf{w}}) &= F(\hat{\mathbf{w}}_D) - F_D(\hat{\mathbf{w}}_D) + F_D(\hat{\mathbf{w}}_D) - F(\hat{\mathbf{w}}) \\ &\leq F(\hat{\mathbf{w}}_D) - F_D(\hat{\mathbf{w}}_D) + F_D(\hat{\mathbf{w}}) - F(\hat{\mathbf{w}}) \\ &= \hat{R}(\hat{\mathbf{w}}_D) - \hat{R}_D(\hat{\mathbf{w}}_D) + \hat{R}_D(\hat{\mathbf{w}}) - \hat{R}(\hat{\mathbf{w}}) \\ &\leq (\|\hat{\mathbf{w}}_D\| + \|\hat{\mathbf{w}}\|) \sup_{i=1, \dots, m} \|\Psi_D(\mathbf{x}_i) - \Psi(\mathbf{x}_i)\| \\ &\leq \sqrt{\frac{8}{\lambda}} \sup_{i=1, \dots, m} \|\Psi_D(\mathbf{x}_i) - \Psi(\mathbf{x}_i)\|. \end{aligned} \quad (3)$$

Theorem 3 then follows from the following lemma.  $\square$

**Lemma 1.** *For any  $0 < \delta < 1$ , the following holds with probability greater than  $1 - \delta$ :*

$$\sup_{i=1, \dots, m} \|\Psi_D(\mathbf{x}_i) - \Psi(\mathbf{x}_i)\| \leq \frac{1}{\sqrt{D}} \left( 2 + \sqrt{8 \log \frac{m}{\delta}} \right).$$

*Proof.* For any  $i \in [1, m]$ , we can apply [Boucheron et al. \(2013, Example 6.3\)](#) to the random vector  $X_j = \Phi(\tilde{\mathbf{x}}_i^j) - \Psi(\mathbf{x}_i)$  that satisfies  $\mathbb{E}X_j = 0$  and  $\|X_j\| \leq 2$  a.s. to get, for any  $u \geq 2/\sqrt{D}$ ,

$$\mathbb{P}(\|\Psi_D(\mathbf{x}_i) - \Psi(\mathbf{x}_i)\| \geq u) \leq \exp\left(-\frac{(u\sqrt{D} - 2)^2}{8}\right).$$

Lemma 1 then follows by a simple union bound.  $\square$

## References

Boucheron, S., Lugosi, G., and Massart, P. *Concentration Inequalities*. Oxford Univ Press, 2013.

**Algorithm 1** Kendall kernel for two interleaving partial rankings.

**Input:** two partial rankings  $A_{i_1, \dots, i_k}, A_{j_1, \dots, j_m} \subset \mathbb{S}_n$ , corresponding to subsets of item indices  $I := \{i_1, \dots, i_k\}$  and  $J := \{j_1, \dots, j_m\}$ .

- 1: Let  $\sigma \in \mathbb{S}_k$  be the total ranking corresponding to the  $k$  observed items in  $A_{i_1, \dots, i_k}$ , and  $\sigma' \in \mathbb{S}_m$  be the total ranking corresponding to the  $m$  observed items in  $A_{j_1, \dots, j_m}$ .
- 2: Let  $\tau \in \mathbb{S}_{|I \cap J|}$  be the total ranking of the observed items indexed by  $I \cap J$  in  $A_{i_1, \dots, i_k}$ , and  $\tau' \in \mathbb{S}_{|I \cap J|}$  the total ranking of the observed items indexed by  $I \cap J$  in partial ranking  $A_{j_1, \dots, j_m}$ .
- 3: Initialize  $s_1 = s_2 = s_3 = s_4 = s_5 = 0$ .
- 4: If  $|I \cap J| \geq 2$ , update

$$s_1 = \frac{\binom{|I \cap J|}{2}}{\binom{n}{2}} K(\tau, \tau').$$

- 5: If  $|I \cap J| \geq 1$  and  $|I \setminus J| \geq 1$ , update

$$s_2 = \frac{1}{\binom{n}{2}(m+1)} \sum_{l \in I \cap J} \left\{ [2\sigma'(l) - m - 1] \times [2(\sigma(l) - \tau(l)) - k + |I \cap J|] \right\}.$$

- 6: If  $|I \cap J| \geq 1$  and  $|J \setminus I| \geq 1$ , update

$$s_3 = \frac{1}{\binom{n}{2}(k+1)} \sum_{l \in I \cap J} \left\{ [2\sigma(l) - k - 1] \times [2(\sigma'(l) - \tau'(l)) - m + |I \cap J|] \right\}.$$

- 7: If  $|I \cap J| \geq 1$  and  $|(I \cup J)^c| \geq 1$ , update

$$s_4 = \frac{|(I \cup J)^c|}{\binom{n}{2}(k+1)(m+1)} \times \sum_{l \in I \cap J} [2\sigma(l) - k - 1][2\sigma'(l) - m - 1].$$

- 8: If  $|I \setminus J| \geq 1$  and  $|J \setminus I| \geq 1$ , update

$$s_5 = \frac{-1}{\binom{n}{2}(k+1)(m+1)} \times \sum_{l \in I \setminus J} [2\sigma(l) - k - 1] \sum_{v \in J \setminus I} [2\sigma'(v) - m - 1].$$

**Output:**  $K(A_{i_1, \dots, i_k}, A_{j_1, \dots, j_m}) = s_1 + s_2 + s_3 + s_4 + s_5$ .

**Algorithm 2** Kendall kernel for a top- $k$  partial ranking and a top- $m$  partial ranking.

**Input:** a top- $k$  partial ranking and a top- $m$  partial ranking  $B_{i_1, \dots, i_k}, B_{j_1, \dots, j_m} \subset \mathbb{S}_n$ , corresponding to subsets of item indices  $I := \{i_1, \dots, i_k\}$  and  $J := \{j_1, \dots, j_m\}$ .

- 1: Let  $\sigma \in \mathbb{S}_k$  be the total ranking corresponding to the  $k$  observed items in  $B_{i_1, \dots, i_k}$ , and  $\sigma' \in \mathbb{S}_m$  be the total ranking corresponding to the  $m$  observed items in  $B_{j_1, \dots, j_m}$ .
- 2: Let  $\tau \in \mathbb{S}_{|I \cap J|}$  be the total ranking of the observed items indexed by  $I \cap J$  in  $B_{i_1, \dots, i_k}$ , and  $\tau' \in \mathbb{S}_{|I \cap J|}$  the total ranking of the observed items indexed by  $I \cap J$  in partial ranking  $B_{j_1, \dots, j_m}$ .
- 3: Initialize  $s_1 = s_2 = s_3 = s_4 = s_5 = 0$ .
- 4: If  $|I \cap J| \geq 2$ , update

$$s_1 = \frac{\binom{|I \cap J|}{2}}{\binom{n}{2}} K(\tau, \tau').$$

- 5: If  $|I \cap J| \geq 1$  and  $|I \setminus J| \geq 1$ , update

$$s_2 = \frac{1}{\binom{n}{2}} \sum_{l \in I \cap J} [2(\sigma(l) - \tau(l)) - k + |I \cap J|].$$

- 6: If  $|I \cap J| \geq 1$  and  $|J \setminus I| \geq 1$ , update

$$s_3 = \frac{1}{\binom{n}{2}} \sum_{l \in I \cap J} [2(\sigma'(l) - \tau'(l)) - m + |I \cap J|].$$

- 7: If  $|I \cap J| \geq 1$  and  $|(I \cup J)^c| \geq 1$ , update

$$s_4 = \frac{|I \cap J| \cdot |(I \cup J)^c|}{\binom{n}{2}}.$$

- 8: If  $|I \setminus J| \geq 1$  and  $|J \setminus I| \geq 1$ , update

$$s_5 = \frac{-|I \setminus J| \cdot |J \setminus I|}{\binom{n}{2}}.$$

**Output:**  $K(B_{i_1, \dots, i_k}, B_{j_1, \dots, j_m}) = s_1 + s_2 + s_3 + s_4 + s_5$ .
